# Supplementary material for: Intergenerational implications of alcohol intake: metabolic disorders in alcohol-naïve rat offspring
Source: PeerJ. 2020 Sep 11;8:e9886. doi: 10.7717/peerj.9886 (PMC7489241; doi:10.7717/peerj.9886)
Supplement: Data S1 [file peerj-08-9886-s001.xls]

## Sheet: Data
Rat Line	Glucose (mg/dL)	GGTP (U/L)	ALAT (U/L)	ASPAT (U/L)	Total cholesterol (mg/dL)	Triglycerides (mg/dL)	Homocysteine (µmol/L)	Amylase (U/L)
WHP	133.1	3.7	100	201	60	47.1	5.8	1787
WHP	130.1	5.2	97	181	75	70	6	2190
WHP	138	4.2	86	207	103	107	9.3	1800
WHP	143	5.4	127	189	102	111	8.4	2393
WHP	148	5.1	91	202	61	54.5	7.6	2884
WHP	174	6	85	164	72	66.2	8.2	1931
WHP	141	5.4	100	229	81	68.9	8.6	2167
WHP	141	4.6	96	231	81	69.6	6	2243
WLP	166.5	9.3	76.8	198.2	33	21.8	6.6	1846
WLP	156.9	9.7	76.7	184.2	38	26	5.7	2419
WLP	157.5	10.7	87.8	228.6	30	19.2	5.5	2156
WLP	151.2	9.3	70.3	186	36	25.8	5.5	2059
WLP	125.9	10	65.1	133.4	30	23.4	3.3	1907
WLP	151.3	9.5	71.6	148.8	37	24.5	2.1	2081
WLP	147.1	9.7	64.6	168.2	41	35.1	3.7	2208
WLP	142.3	10.6	81.1	173.9	34	24.7	5.8	1910
Wistar	147.2	10.6	64.5	140.2	44	39.6	5.9	1654
Wistar	153.7	10	63.7	174.9	44	33.1	6.1	1428
Wistar	153.4	10.3	58.8	129.3	47	38.2	6.1	1796
Wistar	140.8	8.9	61.1	146.1	51	40.4	7.1	1504
Wistar	131.4	9.1	72.9	202.9	43	37.2	7.9	1571
Wistar	136.4	9.8	56.3	138.9	48	38.4	6.9	1503
Wistar	144.5	10.1	67.2	126.9	44	36	6.4	1627
Wistar	137.9	8.6	66	161.1	47	40.4	6.2	1392
